# Supplementary material
Source: Research Square preprint supplement (doi:10.21203/rs.3.rs-9273553/v1)
Supplement: Supplementary file 1 [file 9d2a08e4c66257771962e874.pdf]

1 **Supplementary Material for “A comprehensive analysis of**  
2 **the least-cost healthy diets across China from 2012 to 2023”**

3 Xiaotian Liu<sup>1</sup>, Hongyi Cai<sup>2</sup>, Fan Chen<sup>3</sup>, Anna Herforth<sup>4</sup>, William A. Masters<sup>5</sup>, Xiang Gao<sup>3</sup>, and Yan  
4 Bai<sup>6,7</sup>

- 5 1. Department of Agricultural Economics, Huazhong Agricultural University, Wuhan, China  
6 2. Institute of Environmental Sciences, Leiden University, Leiden, the Netherlands  
7 3. Department of Nutrition and Food Hygiene, School of Public Health, Institute of Nutrition, Fudan  
8 University, Shanghai, China  
9 4. Food Prices for Nutrition, Boston, the USA  
10 5. Friedman School of Nutrition Science and Policy, Boston, the USA  
11 6. Development Data Group, the World Bank, Washington DC, the USA  
12 7. School of Public Affairs, Zhejiang University, Hangzhou, China

13

14 Contact authors: Dr. Yan Bai [ybai@worldbank.org](mailto:ybai@worldbank.org) and Dr. Xiang Gao  
15 [xiang\\_gao@fudan.edu.cn](mailto:xiang_gao@fudan.edu.cn)

16

17

18

19

20

21

22

23

24

25 **Table S1 . Recommended energy intake (kcal) and item number for the four healthy**  
 26 **recommended diets.**

| CDG-2022                             | item       |           | CDG-2016                                  | item       |           | ELD                     | item       |           | HDB                     | item       |           |
|--------------------------------------|------------|-----------|-------------------------------------------|------------|-----------|-------------------------|------------|-----------|-------------------------|------------|-----------|
|                                      | kcal       | s         |                                           | kcal       | s         |                         | kcal       | s         |                         | kcal       | s         |
| Starchy staples <sup>1</sup>         | 982        | 2         | Starchy staples <sup>1</sup>              | 114        | 2         | Cereals                 | 715        | 1         | Starchy staples         | 116        | 2         |
|                                      |            |           |                                           | 3          |           | Starchy roots           | 49         | 1         |                         | 0          |           |
| Dark-green leafy vegetables          | 44         | 1         | Dark-green leafy or red/orange vegetables | 39         | 1         | Vegetables              | 92         | 3         | Vegetables              | 110        | 3         |
| Red/orange vegetables                | 44         | 1         | vegetables                                |            |           |                         |            |           |                         |            |           |
| Other vegetables                     | 44         | 1         | Other vegetables                          | 78         | 2         |                         |            |           |                         |            |           |
| Fruits                               | 188        | 2         | Fruits                                    | 169        | 2         | Fruits                  | 141        | 2         | Fruits                  | 160        | 2         |
| Legumes, nuts and seeds <sup>2</sup> | 145        | 1         | Legumes, nuts and seeds <sup>2</sup>      | 166        | 1         | Legumes, nuts and seeds | 536        | 1         | Legumes, nuts and seeds | 300        | 2         |
| Meat, fish and eggs                  | 249        | 1         | Meat, fish and eggs                       | 224        | 2         | Red meat                | 44         | 1         | Animal-source foods     | 300        | 1         |
|                                      |            |           |                                           |            |           | Fish                    | 24         | 1         |                         |            |           |
|                                      |            |           |                                           |            |           | Poultry                 | 58         | 1         |                         |            |           |
|                                      |            |           |                                           |            |           | Eggs                    | 19         | 1         |                         |            |           |
| Dairy                                | 265        | 1         | Dairy                                     | 179        | 1         | Dairy                   | 141        | 1         |                         |            |           |
| Oils and fats                        | 264        | 1         | Oils and fats                             | 237        | 1         | Oils and fats           | 399        | 1         |                         | 300        | 1         |
|                                      |            |           |                                           |            |           |                         |            |           | Oils and fats           |            |           |
| Added-sugars                         | 105        | 1         | Added-sugars                              | 95         | 1         | Added-sugars            | 112        | 1         |                         |            |           |
|                                      | <b>233</b> |           |                                           | <b>233</b> |           |                         | <b>233</b> |           |                         | <b>233</b> |           |
| <b>Total</b>                         | <b>0</b>   | <b>12</b> |                                           | <b>0</b>   | <b>13</b> |                         | <b>0</b>   | <b>15</b> |                         | <b>0</b>   | <b>11</b> |

27 **Note:**

- 28 1. Due to limitations in food description detail and item coverage in the price dataset, whole grains cannot be  
 29 distinguished from other starchy staple foods in estimating the cost of the Chinese Dietary Guideline diets.  
 30 2. Under the Chinese Dietary Guidelines, only soy-based products are classified within the “legumes, nuts, and  
 31 seeds” (plant-based protein) food group, while other beans are classified as starchy staple foods (whole grains). In  
 32 the price dataset, however, tofu is the only item available that falls within the legumes, nuts, and seeds category.  
 33  
 34  
 35  
 36  
 37  
 38

39 **Table S2. Mean and distribution of nominal and CPI-adjusted real costs of least-cost**  
 40 **healthy diets by dietary guideline and year**

| Dietary guidelines | Year | Obs   | Nominal cost |       |          |          | Real cost |       |          |          |
|--------------------|------|-------|--------------|-------|----------|----------|-----------|-------|----------|----------|
|                    |      |       | Mean         | SD    | 25th pct | 75th pct | Mean      | SD    | 25th pct | 75th pct |
| <b>CDG-2022</b>    | 2012 | 31    | 12.03        | 1.01  | 11.39    | 12.64    | 12.03     | 1.01  | 11.39    | 12.64    |
|                    | 2013 | 31    | 12.65        | 1.12  | 12.02    | 13.18    | 12.30     | 1.08  | 11.67    | 12.86    |
|                    | 2014 | 31    | 13.48        | 1.29  | 12.73    | 13.98    | 12.85     | 1.19  | 12.16    | 13.34    |
|                    | 2015 | 31    | 13.39        | 1.27  | 12.37    | 13.67    | 12.58     | 1.14  | 11.74    | 12.89    |
|                    | 2016 | 31    | 13.69        | 1.39  | 12.67    | 14.51    | 12.62     | 1.19  | 11.75    | 13.43    |
|                    | 2017 | 31    | 13.29        | 1.45  | 12.29    | 14.16    | 12.07     | 1.22  | 11.19    | 12.90    |
|                    | 2018 | 31    | 13.77        | 1.45  | 12.53    | 14.72    | 12.25     | 1.21  | 11.31    | 13.15    |
|                    | 2019 | 31    | 14.70        | 1.64  | 13.43    | 15.70    | 12.73     | 1.33  | 11.73    | 13.69    |
|                    | 2020 | 31    | 14.99        | 1.63  | 13.75    | 16.14    | 12.68     | 1.30  | 11.82    | 13.54    |
|                    | 2021 | 31    | 15.25        | 1.55  | 14.06    | 16.41    | 12.78     | 1.24  | 11.88    | 13.99    |
|                    | 2022 | 31    | 15.97        | 1.54  | 14.76    | 16.95    | 13.14     | 1.19  | 12.23    | 14.14    |
| 2023               | 31   | 15.81 | 1.52         | 14.74 | 16.61    | 12.98    | 1.18      | 12.07 | 13.81    |          |
| <b>CDG-2016</b>    | 2012 | 31    | 10.44        | 0.90  | 9.92     | 10.84    | 10.44     | 0.90  | 9.92     | 10.84    |
|                    | 2013 | 31    | 11.07        | 0.94  | 10.51    | 11.43    | 10.77     | 0.91  | 10.17    | 11.12    |
|                    | 2014 | 31    | 11.75        | 1.06  | 11.12    | 12.08    | 11.20     | 0.98  | 10.58    | 11.54    |
|                    | 2015 | 31    | 11.58        | 1.06  | 10.74    | 11.81    | 10.88     | 0.94  | 10.14    | 11.11    |
|                    | 2016 | 31    | 11.69        | 1.18  | 10.89    | 12.20    | 10.78     | 1.01  | 10.11    | 11.30    |
|                    | 2017 | 31    | 11.40        | 1.22  | 10.55    | 11.93    | 10.36     | 1.02  | 9.68     | 10.90    |
|                    | 2018 | 31    | 11.93        | 1.18  | 10.91    | 12.52    | 10.61     | 0.98  | 9.81     | 11.18    |
|                    | 2019 | 31    | 12.58        | 1.36  | 11.46    | 13.38    | 10.89     | 1.09  | 10.07    | 11.58    |
|                    | 2020 | 31    | 12.96        | 1.26  | 11.95    | 13.74    | 10.96     | 0.99  | 10.28    | 11.69    |
|                    | 2021 | 31    | 13.19        | 1.24  | 12.20    | 13.90    | 11.06     | 0.97  | 10.39    | 11.84    |
|                    | 2022 | 31    | 13.78        | 1.27  | 12.84    | 14.53    | 11.33     | 0.97  | 10.68    | 12.03    |
| 2023               | 31   | 13.67 | 1.29         | 12.74 | 14.16    | 11.22    | 0.98      | 10.54 | 11.75    |          |
| <b>HDB</b>         | 2012 | 31    | 8.84         | 0.84  | 8.45     | 9.18     | 8.84      | 0.84  | 8.45     | 9.18     |
|                    | 2013 | 31    | 9.39         | 0.84  | 8.95     | 9.72     | 9.13      | 0.81  | 8.69     | 9.49     |
|                    | 2014 | 31    | 9.82         | 0.93  | 9.30     | 10.10    | 9.36      | 0.86  | 8.92     | 9.65     |
|                    | 2015 | 31    | 9.72         | 0.90  | 9.24     | 9.96     | 9.13      | 0.80  | 8.71     | 9.35     |
|                    | 2016 | 31    | 9.85         | 1.01  | 9.24     | 10.34    | 9.09      | 0.87  | 8.58     | 9.53     |
|                    | 2017 | 31    | 9.57         | 1.06  | 8.90     | 10.13    | 8.69      | 0.89  | 8.08     | 9.15     |
|                    | 2018 | 31    | 10.09        | 1.05  | 9.40     | 10.66    | 8.98      | 0.87  | 8.40     | 9.44     |
|                    | 2019 | 31    | 10.81        | 1.21  | 9.94     | 11.49    | 9.35      | 0.98  | 8.69     | 10.01    |
|                    | 2020 | 31    | 11.22        | 1.14  | 10.50    | 11.79    | 9.49      | 0.91  | 8.97     | 10.03    |
|                    | 2021 | 31    | 11.36        | 1.09  | 10.58    | 11.99    | 9.53      | 0.86  | 8.89     | 10.04    |
|                    | 2022 | 31    | 11.91        | 1.13  | 11.12    | 12.68    | 9.80      | 0.87  | 9.19     | 10.42    |
| 2023               | 31   | 11.77 | 1.16         | 10.85 | 12.17    | 9.66     | 0.88      | 8.97  | 10.10    |          |
| <b>EAT-LANCET</b>  | 2012 | 31    | 11.73        | 1.02  | 11.13    | 12.05    | 11.73     | 1.02  | 11.13    | 12.05    |
|                    | 2013 | 31    | 12.40        | 1.09  | 11.83    | 12.64    | 12.06     | 1.05  | 11.48    | 12.28    |

|      |    |       |      |       |       |       |      |       |       |
|------|----|-------|------|-------|-------|-------|------|-------|-------|
| 2014 | 31 | 13.03 | 1.18 | 12.31 | 13.39 | 12.42 | 1.09 | 11.75 | 12.71 |
| 2015 | 31 | 12.97 | 1.14 | 12.24 | 13.27 | 12.18 | 1.01 | 11.53 | 12.52 |
| 2016 | 31 | 13.07 | 1.28 | 12.15 | 13.57 | 12.05 | 1.09 | 11.29 | 12.57 |
| 2017 | 31 | 12.98 | 1.35 | 12.10 | 13.42 | 11.79 | 1.14 | 11.09 | 12.14 |
| 2018 | 31 | 13.51 | 1.40 | 12.57 | 14.08 | 12.02 | 1.17 | 11.19 | 12.50 |
| 2019 | 31 | 14.14 | 1.57 | 12.94 | 14.77 | 12.24 | 1.27 | 11.33 | 12.77 |
| 2020 | 31 | 14.56 | 1.56 | 13.49 | 15.17 | 12.31 | 1.25 | 11.58 | 12.82 |
| 2021 | 31 | 14.95 | 1.54 | 13.82 | 15.63 | 12.54 | 1.23 | 11.66 | 13.06 |
| 2022 | 31 | 15.66 | 1.65 | 14.42 | 16.38 | 12.88 | 1.28 | 12.01 | 13.46 |
| 2023 | 31 | 15.75 | 1.62 | 14.50 | 16.59 | 12.92 | 1.25 | 11.89 | 13.76 |

41

42

43

44

45

46

47

48

49

50

51

52

53

54

Difference Between Diet Growth and Food CPI (pp): CDG-2016

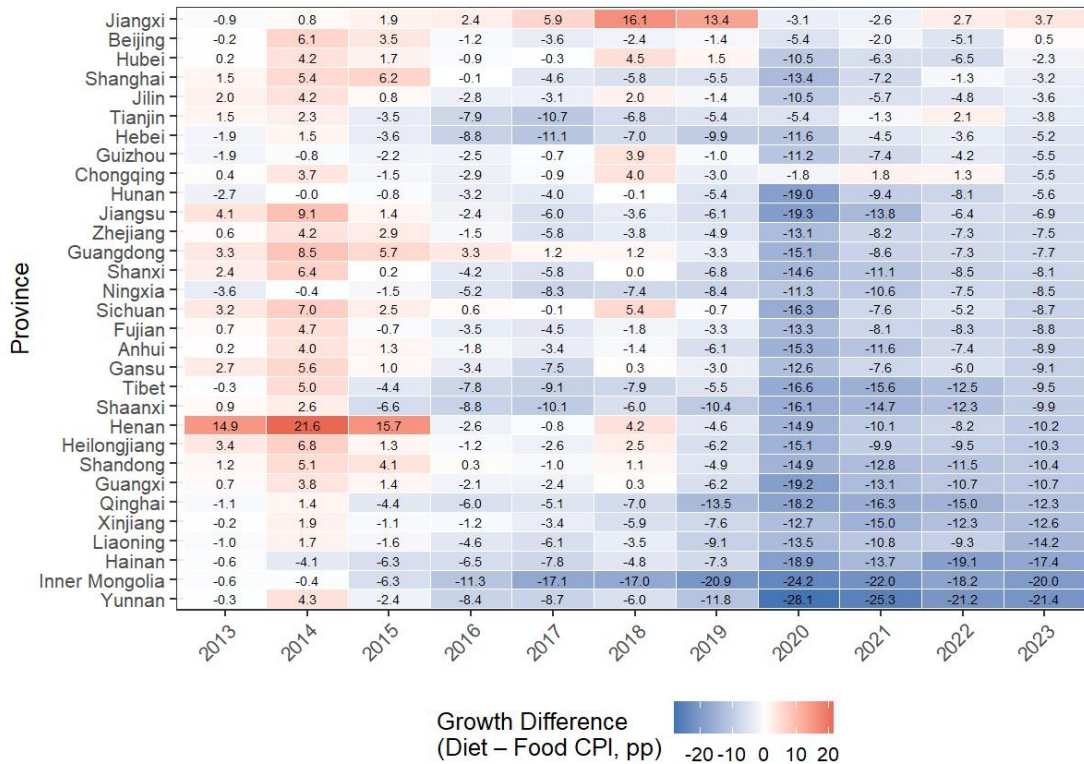

55  
 56 **Figure S1. Difference between cumulative growth in the least-cost CDG-2016 diet and the food CPI in China,**  
 57 **by province and year (base year = 2012).** For each province, annual least-cost diet estimates for CDG-2016 are  
 58 converted to a cumulative index with 2012 = 100 and compared with the corresponding provincial food consumer  
 59 price index (CPI). Each cell represents a province–year observation. Blue shading indicates provinces where  
 60 cumulative food CPI growth exceeds diet cost growth, while red shading indicates provinces where the least-cost  
 61 CDG-2016 diet has increased faster than food prices overall.

62

Difference Between Diet Growth and Food CPI (pp): HDB

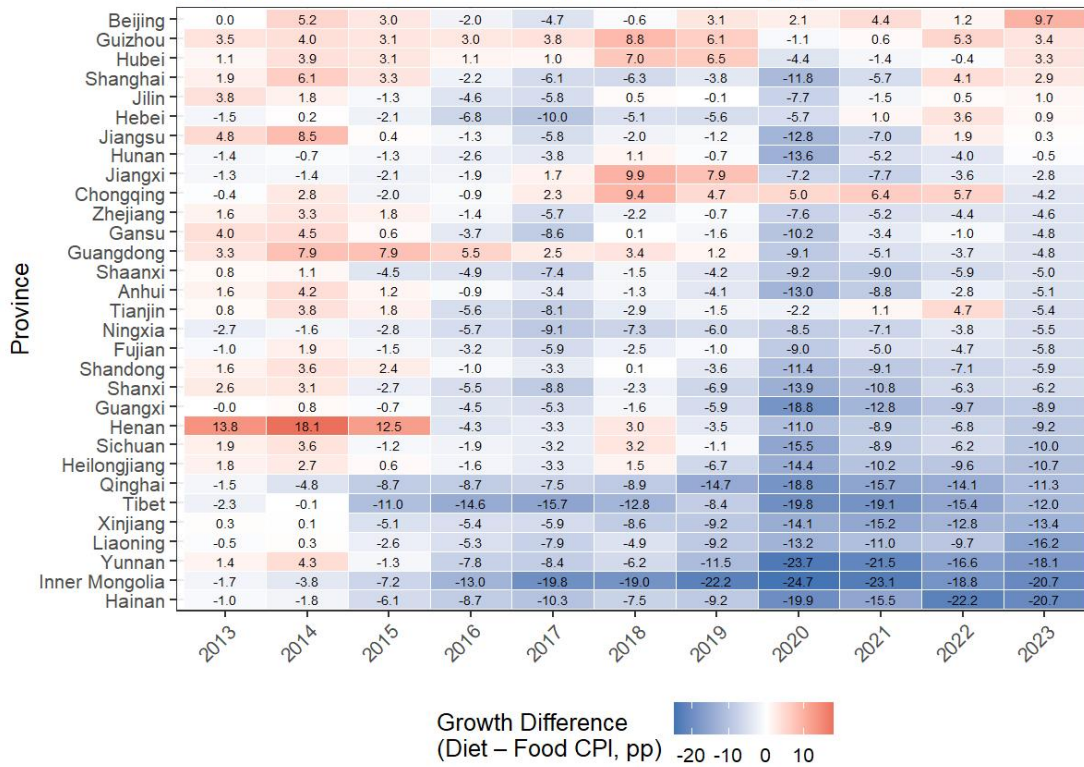

63

64

**Figure S2. Difference between cumulative growth in the least-cost HDB diet and the food CPI in China, by province and year (base year = 2012).** For each province, annual least-cost diet estimates for HDB are converted to a cumulative index with 2012 = 100 and compared with the corresponding provincial food consumer price index (CPI). Each cell represents a province–year observation. Blue shading indicates provinces where cumulative food CPI growth exceeds diet cost growth, while red shading indicates provinces where the least-cost HDB diet has increased faster than food prices overall.

70

71

Difference Between Diet Growth and Food CPI (pp): EAT-LANCET

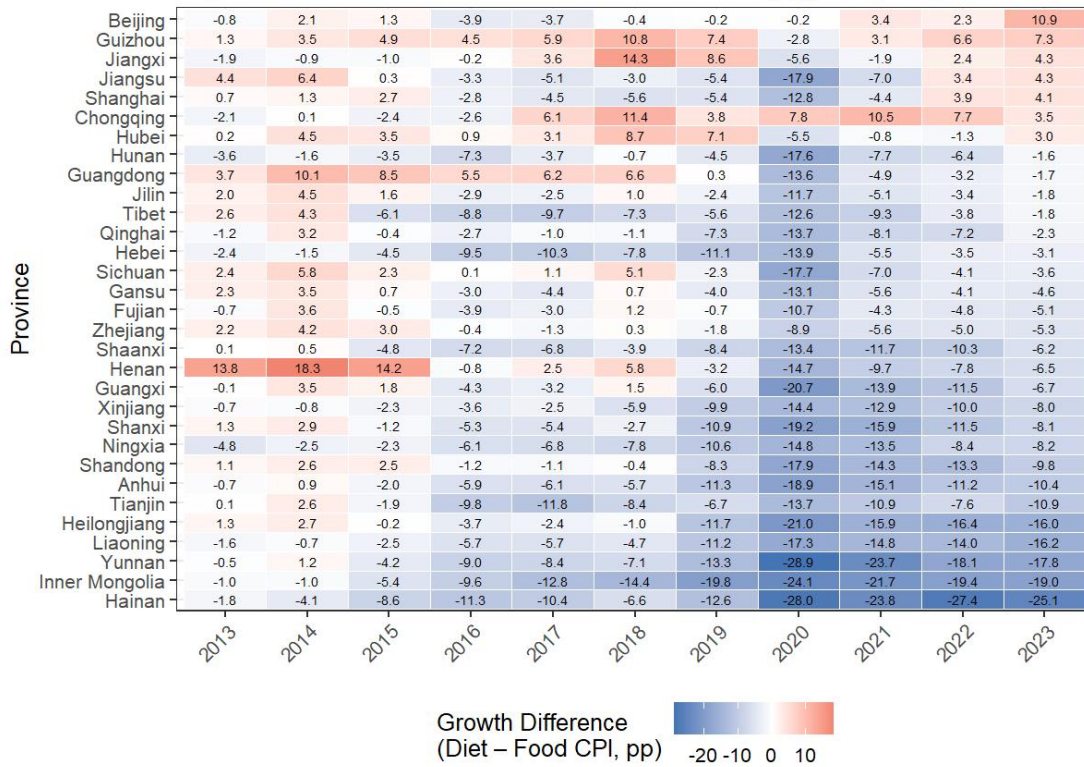

72  
73  
74  
75  
76  
77  
78  
  
79  
  
80  
  
81  
  
82  
  
83  
  
84  
  
85  
  
86  
  
87  
  
88

**Figure S3. Difference between cumulative growth in the least-cost ELD diet and the food CPI in China, by province and year (base year = 2012).** For each province, annual least-cost diet estimates for ELD are converted to a cumulative index with 2012 = 100 and compared with the corresponding provincial food consumer price index (CPI). Each cell represents a province–year observation. Blue shading indicates provinces where cumulative food CPI growth exceeds diet cost growth, while red shading indicates provinces where the least-cost ELD diet has increased faster than food prices overall.

89 **Table S3. Nutrient adequacy ratio (NAR) and mean adequacy ratio (MAR) across four**  
 90 **least-cost healthy recommended diets in China.**

| Dietary guidelines | Item       | Obs    | Mean | Median | SD   | 25th pct | 75th pct |
|--------------------|------------|--------|------|--------|------|----------|----------|
| CDG-2022           | MAR        | 14,133 | 0.96 | 0.96   | 0.02 | 0.94     | 0.97     |
|                    | protein    | 14,133 | 1.00 | 1.00   | 0.00 | 1.00     | 1.00     |
|                    | Ca         | 14,133 | 1.00 | 1.00   | 0.00 | 1.00     | 1.00     |
|                    | P          | 14,133 | 1.00 | 1.00   | 0.00 | 1.00     | 1.00     |
|                    | Mg         | 14,133 | 1.00 | 1.00   | 0.00 | 1.00     | 1.00     |
|                    | Fe         | 14,133 | 0.97 | 1.00   | 0.04 | 0.96     | 1.00     |
|                    | Zn         | 14,133 | 0.99 | 1.00   | 0.02 | 1.00     | 1.00     |
|                    | Se         | 14,133 | 0.68 | 0.67   | 0.14 | 0.58     | 0.70     |
|                    | Cu         | 14,133 | 1.00 | 1.00   | 0.00 | 1.00     | 1.00     |
|                    | Vitamin A  | 14,133 | 1.00 | 1.00   | 0.00 | 1.00     | 1.00     |
|                    | thiamin    | 14,133 | 0.94 | 0.97   | 0.07 | 0.86     | 1.00     |
|                    | riboflavin | 14,133 | 0.98 | 0.98   | 0.03 | 0.96     | 1.00     |
|                    | niacin     | 14,133 | 0.94 | 0.97   | 0.07 | 0.90     | 1.00     |
|                    | Vitamin C  | 14,133 | 0.96 | 1.00   | 0.11 | 1.00     | 1.00     |
| CDG-2016           | MAR        | 14,133 | 0.96 | 0.96   | 0.02 | 0.94     | 0.98     |
|                    | protein    | 14,133 | 1.00 | 1.00   | 0.00 | 1.00     | 1.00     |
|                    | Ca         | 14,133 | 1.00 | 1.00   | 0.00 | 1.00     | 1.00     |
|                    | P          | 14,133 | 1.00 | 1.00   | 0.00 | 1.00     | 1.00     |
|                    | Mg         | 14,133 | 1.00 | 1.00   | 0.00 | 1.00     | 1.00     |
|                    | Fe         | 14,133 | 0.98 | 1.00   | 0.03 | 0.98     | 1.00     |
|                    | Zn         | 14,133 | 0.99 | 1.00   | 0.03 | 0.98     | 1.00     |
|                    | Se         | 14,133 | 0.81 | 0.78   | 0.09 | 0.75     | 0.89     |
|                    | Cu         | 14,133 | 1.00 | 1.00   | 0.00 | 1.00     | 1.00     |
|                    | Vitamin A  | 14,133 | 1.00 | 1.00   | 0.00 | 1.00     | 1.00     |
|                    | thiamin    | 14,133 | 0.93 | 0.98   | 0.08 | 0.86     | 1.00     |
|                    | riboflavin | 14,133 | 0.92 | 0.92   | 0.05 | 0.89     | 0.95     |
|                    | niacin     | 14,133 | 0.88 | 0.89   | 0.09 | 0.83     | 0.97     |
|                    | Vitamin C  | 14,133 | 1.00 | 1.00   | 0.03 | 1.00     | 1.00     |
| HDB                | MAR        | 14,253 | 0.95 | 0.95   | 0.02 | 0.93     | 0.96     |
|                    | protein    | 14,253 | 1.00 | 1.00   | 0.00 | 1.00     | 1.00     |
|                    | Ca         | 14,253 | 0.95 | 0.97   | 0.05 | 0.92     | 1.00     |
|                    | P          | 14,253 | 1.00 | 1.00   | 0.00 | 1.00     | 1.00     |
|                    | Mg         | 14,253 | 1.00 | 1.00   | 0.00 | 1.00     | 1.00     |
|                    | Fe         | 14,253 | 1.00 | 1.00   | 0.01 | 1.00     | 1.00     |
|                    | Zn         | 14,253 | 1.00 | 1.00   | 0.00 | 1.00     | 1.00     |
|                    | Se         | 14,253 | 0.86 | 0.84   | 0.10 | 0.81     | 0.95     |
|                    | Cu         | 14,253 | 1.00 | 1.00   | 0.00 | 1.00     | 1.00     |
|                    | Vitamin A  | 14,253 | 0.98 | 1.00   | 0.07 | 1.00     | 1.00     |
|                    | thiamin    | 14,253 | 0.94 | 1.00   | 0.08 | 0.88     | 1.00     |
|                    | riboflavin | 14,253 | 0.67 | 0.67   | 0.06 | 0.64     | 0.69     |

|                   |                   |        |      |      |      |      |      |
|-------------------|-------------------|--------|------|------|------|------|------|
|                   | <b>niacin</b>     | 14,253 | 0.90 | 0.91 | 0.09 | 0.85 | 1.00 |
|                   | <b>Vitamin C</b>  | 14,253 | 0.99 | 1.00 | 0.05 | 1.00 | 1.00 |
| <b>EAT-LANCET</b> | <b>MAR</b>        | 14,101 | 0.96 | 0.97 | 0.01 | 0.96 | 0.97 |
|                   | <b>protein</b>    | 14,101 | 1.00 | 1.00 | 0.00 | 1.00 | 1.00 |
|                   | <b>Ca</b>         | 14,101 | 1.00 | 1.00 | 0.00 | 1.00 | 1.00 |
|                   | <b>P</b>          | 14,101 | 1.00 | 1.00 | 0.00 | 1.00 | 1.00 |
|                   | <b>Mg</b>         | 14,101 | 1.00 | 1.00 | 0.00 | 1.00 | 1.00 |
|                   | <b>Fe</b>         | 14,101 | 1.00 | 1.00 | 0.00 | 1.00 | 1.00 |
|                   | <b>Zn</b>         | 14,101 | 1.00 | 1.00 | 0.00 | 1.00 | 1.00 |
|                   | <b>Se</b>         | 14,101 | 0.78 | 0.80 | 0.07 | 0.76 | 0.81 |
|                   | <b>Cu</b>         | 14,101 | 1.00 | 1.00 | 0.00 | 1.00 | 1.00 |
|                   | <b>Vitamin A</b>  | 14,101 | 0.98 | 1.00 | 0.09 | 1.00 | 1.00 |
|                   | <b>thiamin</b>    | 14,101 | 0.98 | 1.00 | 0.05 | 1.00 | 1.00 |
|                   | <b>riboflavin</b> | 14,101 | 0.77 | 0.76 | 0.04 | 0.75 | 0.80 |
|                   | <b>niacin</b>     | 14,101 | 1.00 | 1.00 | 0.01 | 1.00 | 1.00 |
|                   | <b>Vitamin C</b>  | 14,101 | 0.99 | 1.00 | 0.05 | 1.00 | 1.00 |

91

92

93

94

95

96

97

98

99

100

101

102

103

104

105

106

107

108 **Table S4. Top 15 food items by total energy contribution in least-cost diets, by**  
 109 **benchmark guideline**

| <b>Diet guidelines</b> | <b>Food item (English)</b>                     | <b>Energy share</b> |
|------------------------|------------------------------------------------|---------------------|
| <b>CDG-2022</b>        | Wheat flour (standard grade)                   | 16.1%               |
|                        | Wheat flour (premium grade)                    | 10.8%               |
|                        | Soybean oil (bulk, Grade I, solvent-extracted) | 10.0%               |
|                        | Fresh pork (rib cut)                           | 9.2%                |
|                        | Milk (UHT, 240 ml pillow pack)                 | 8.3%                |
|                        | Tofu (unpackaged)                              | 6.2%                |
|                        | Late indica rice (Grade II)                    | 5.6%                |
|                        | Corn flour (degermed maize)                    | 5.6%                |
|                        | Japonica rice (Grade II)                       | 4.0%                |
|                        | Banana (domestic, Grade I)                     | 4.0%                |
|                        | White sugar (bagged)                           | 3.8%                |
|                        | Milk (UHT, 250 ml carton)                      | 3.0%                |
|                        | Pear (Ya pear, Grade I)                        | 2.4%                |
|                        | Carrot (fresh, Grade I)                        | 1.9%                |
|                        | Chinese chives (fresh, Grade I)                | 1.6%                |
| <b>CDG-2016</b>        | Wheat flour (standard grade)                   | 18.7%               |
|                        | Wheat flour (premium grade)                    | 12.6%               |
|                        | Soybean oil (bulk, Grade I, solvent-extracted) | 9.0%                |
|                        | Tofu (unpackaged)                              | 7.1%                |
|                        | Late indica rice (Grade II)                    | 6.5%                |
|                        | Corn flour (degermed maize)                    | 6.5%                |
|                        | Milk (UHT, 240 ml pillow pack)                 | 5.6%                |
|                        | Fresh pork (rib cut)                           | 4.8%                |
|                        | Japonica rice (Grade II)                       | 4.7%                |
|                        | Eggs (fresh, whole)                            | 4.4%                |
|                        | Banana (domestic, Grade I)                     | 3.6%                |
|                        | White sugar (bagged)                           | 3.5%                |
|                        | Pear (Ya pear, Grade I)                        | 2.1%                |
|                        | Milk (UHT, 250 ml carton)                      | 2.0%                |
|                        | Carrot (fresh, Grade I)                        | 1.6%                |
| <b>HDB</b>             | Wheat flour (standard grade)                   | 19.0%               |
|                        | Tofu (unpackaged)                              | 12.9%               |
|                        | Wheat flour (premium grade)                    | 12.8%               |
|                        | Soybean oil (bulk, Grade I, solvent-extracted) | 11.4%               |
|                        | Late indica rice (Grade II)                    | 6.7%                |
|                        | Corn flour (degermed maize)                    | 6.6%                |
|                        | Fresh pork (rib cut)                           | 6.4%                |
|                        | Eggs (fresh, whole)                            | 6.0%                |
|                        | Japonica rice (Grade II)                       | 4.8%                |

|                   |                                                |       |
|-------------------|------------------------------------------------|-------|
|                   | Banana (domestic, Grade I)                     | 3.4%  |
|                   | Pear (Ya pear, Grade I)                        | 2.0%  |
|                   | Carrot (fresh, Grade I)                        | 1.5%  |
|                   | Cabbage (fresh, Grade I)                       | 1.5%  |
|                   | Blended soybean oil (Grade I)                  | 1.3%  |
|                   | Radish (fresh, Grade I)                        | 1.0%  |
| <b>EAT-LANCET</b> | Tofu (unpackaged)                              | 23.0% |
|                   | Wheat flour (standard grade)                   | 19.5% |
|                   | Soybean oil (bulk, Grade I, solvent-extracted) | 15.1% |
|                   | Milk (UHT, 240 ml pillow pack)                 | 4.4%  |
|                   | White sugar (bagged)                           | 4.1%  |
|                   | Wheat flour (premium grade)                    | 3.8%  |
|                   | Late indica rice (Grade II)                    | 3.1%  |
|                   | Banana (domestic, Grade I)                     | 3.0%  |
|                   | Chicken (whole, eviscerated, premium)          | 2.5%  |
|                   | Corn flour (degermed maize)                    | 2.3%  |
|                   | Potato (fresh, Grade I)                        | 2.1%  |
|                   | Japonica rice (Grade II)                       | 2.0%  |
|                   | Fresh pork (rib cut)                           | 1.9%  |
|                   | Pear (Ya pear, Grade I)                        | 1.8%  |
|                   | Blended soybean oil (Grade I)                  | 1.7%  |

110

111

112

113

114

115

116

117

118

119

120

121

122

123

**Table S5. List of food items in the China Price Information Network**

| No | Food Group | Food Item (English)                 | Food Item (Chinese) | Unit Used in Price Data |
|----|------------|-------------------------------------|---------------------|-------------------------|
| 1  | Grain      | Rice (late indica)                  | 晚籼米                 | yuan / 500 g            |
| 2  | Grain      | Rice (japonica)                     | 粳米                  | yuan / 500 g            |
| 3  | Grain      | Wheat flour (premium)               | 面粉一                 | yuan / 500 g            |
| 4  | Grain      | Wheat flour (standard)              | 面粉二                 | yuan / 500 g            |
| 5  | Grain      | Corn flour                          | 玉米粉                 | yuan / 500 g            |
| 6  | Tubers     | Potato                              | 土豆                  | yuan / 500 g            |
| 7  | Vegetables | Chinese cabbage                     | 大白菜                 | yuan / 500 g            |
| 8  | Vegetables | Cabbage                             | 圆白菜                 | yuan / 500 g            |
| 9  | Vegetables | Rape green                          | 油菜                  | yuan / 500 g            |
| 10 | Vegetables | Chinese chives                      | 韭菜                  | yuan / 500 g            |
| 11 | Vegetables | Celery                              | 芹菜                  | yuan / 500 g            |
| 12 | Vegetables | Eggplant                            | 茄子                  | yuan / 500 g            |
| 13 | Vegetables | Tomato                              | 西红柿                 | yuan / 500 g            |
| 14 | Vegetables | Cucumber                            | 黄瓜                  | yuan / 500 g            |
| 15 | Vegetables | Radish                              | 萝卜                  | yuan / 500 g            |
| 16 | Vegetables | Carrot                              | 胡萝卜                 | yuan / 500 g            |
| 17 | Vegetables | Green pepper                        | 青椒                  | yuan / 500 g            |
| 18 | Vegetables | Chili pepper                        | 尖椒                  | yuan / 500 g            |
| 19 | Vegetables | Garlic scapes                       | 蒜苔                  | yuan / 500 g            |
| 20 | Vegetables | Green beans                         | 豆角                  | yuan / 500 g            |
| 21 | Fruits     | Apple                               | 苹果                  | yuan / 500 g            |
| 22 | Fruits     | Pear                                | 梨                   | yuan / 500 g            |
| 23 | Fruits     | Orange                              | 橙子                  | yuan / 500 g            |
| 24 | Fruits     | Banana                              | 香蕉                  | yuan / 500 g            |
| 25 | Fruits     | Watermelon                          | 西瓜                  | yuan / 500 g            |
| 26 | Legumes    | Tofu                                | 豆腐                  | yuan / 500 g            |
| 27 | Dairy      | Milk (240 ml pack)                  | 牛奶                  | yuan / pack             |
| 28 | Dairy      | Milk (250 ml carton)                | 牛奶                  | yuan / carton           |
| 29 | Dairy      | Domestic infant formula             | 国产奶粉                | yuan / 400 g            |
| 30 | Dairy      | Imported infant formula             | 进口奶粉                | yuan / 400 g            |
| 31 | Eggs       | Eggs                                | 鸡蛋                  | yuan / 500 g            |
| 32 | Poultry    | Chicken                             | 鸡肉                  | yuan / 500 g            |
| 33 | Red meat   | Pork (lean)                         | 猪肉 (瘦)              | yuan / 500 g            |
| 34 | Red meat   | Pork ribs                           | 猪小排                 | yuan / 500 g            |
| 35 | Red meat   | Pork belly                          | 猪肉 (肋条肉)            | yuan / 500 g            |
| 36 | Red meat   | Pork (leg, without bone, with skin) | 带皮后腿肉               | yuan / 500 g            |
| 37 | Red meat   | Beef (brisket)                      | 牛肉 (腹部肉)            | yuan / 500 g            |
| 38 | Red meat   | Beef (shank)                        | 牛肉 (后腱)             | yuan / 500 g            |
| 39 | Red meat   | Lamb (without bone)                 | 羊肉 (新鲜去骨)           | yuan / 500 g            |
| 40 | Red meat   | Lamb (leg with bone)                | 羊肉 (后腿, 带骨)         | yuan / 500 g            |

|    |                    |                       |       |               |
|----|--------------------|-----------------------|-------|---------------|
| 41 | Fish and shellfish | Hairtail              | 带鱼    | yuan / 500 g  |
| 42 | Fish and shellfish | Prawns                | 海虾    | yuan / 500 g  |
| 43 | Fish and shellfish | Grass carp            | 草鱼    | yuan / 500 g  |
| 44 | Fish and shellfish | Silver carp           | 鲢鱼    | yuan / 500 g  |
| 45 | Fish and shellfish | Common carp           | 鲤鱼    | yuan / 500 g  |
| 46 | Fish and shellfish | Crucian carp          | 鲫鱼    | yuan / 500 g  |
| 47 | Fish and shellfish | Bighead carp          | 鳊鱼    | yuan / 500 g  |
| 48 | Fish and shellfish | Yellow croaker        | 黄鱼    | yuan / 500 g  |
| 49 | Oils & fats        | Soybean oil           | 大豆油   | yuan / 5 L    |
| 50 | Oils & fats        | Blended vegetable oil | 大豆调和油 | yuan / 5 L    |
| 51 | Oils & fats        | Peanut oil            | 花生油   | yuan / 5 L    |
| 52 | Oils & fats        | Rapeseed oil          | 菜籽油   | yuan / 5 L    |
| 53 | Condiments         | Sugar                 | 白砂糖   | yuan / 500 g  |
| 54 | Condiments         | Brown sugar           | 红糖    | yuan / 500 g  |
| 55 | Condiments         | Salt                  | 食用盐   | yuan / 500 g  |
| 56 | Condiments         | Soy sauce             | 酱油    | yuan / bottle |
| 57 | Condiments         | Vinegar               | 醋     | yuan / bottle |
| 58 | Condiments         | MSG                   | 味精    | yuan / 500 g  |
| 59 | Processed foods    | Instant noodles       | 方便面   | yuan / pack   |
| 60 | Processed foods    | Biscuits              | 饼干    | yuan / pack   |
| 61 | Beverages          | Mineral water         | 矿泉水   | yuan / bottle |
| 62 | Beverages          | Carbonated drink      | 碳酸饮料  | yuan / bottle |

126

127 **Note:** The retail price database includes 62 food items monitored in the national food price system. For  
128 the least-cost diet analysis in this study, 52 items were used. The following items were excluded  
129 because they are not part of the dietary reference frameworks for healthy adults or do not contribute  
130 meaningfully to energy intakes in the diet modelling: MSG (味精), infant formula products (奶粉),  
131 instant noodles (方便面), mineral water (矿泉水), carbonated beverages (碳酸饮料), soy sauce (酱油),  
132 vinegar (醋), table salt (食用盐), and biscuits (饼干).

133
